# Supplementary material
Source: PubMed Central journal article supplement (PMC9513562)
Supplement: NIHMS1835888-supplement-abl5282_SupplementalMaterial_v3.pdf [file NIHMS1835888-supplement-abl5282_SupplementalMaterial_v3.pdf]

# Supplementary Materials for

## **Tuning T cell receptor sensitivity through catch bond engineering**

Xiang Zhao, Elizabeth M. Kolawole, Waipan Chan, Yinnian Feng, Xinbo Yang, Marvin Gee, Kevin M. Jude, Leah V. Sibener, Polly M. Fordyce, Ronald N. Germain, Brian D. Evavold, K. Christopher Garcia\*

\*Corresponding author. Email: [kcgarcia@stanford.edu](mailto:kcgarcia@stanford.edu)

### **This PDF file includes:**

Figs. S1 to S16

Tables S1 to S12

## Supplementary Figure 1

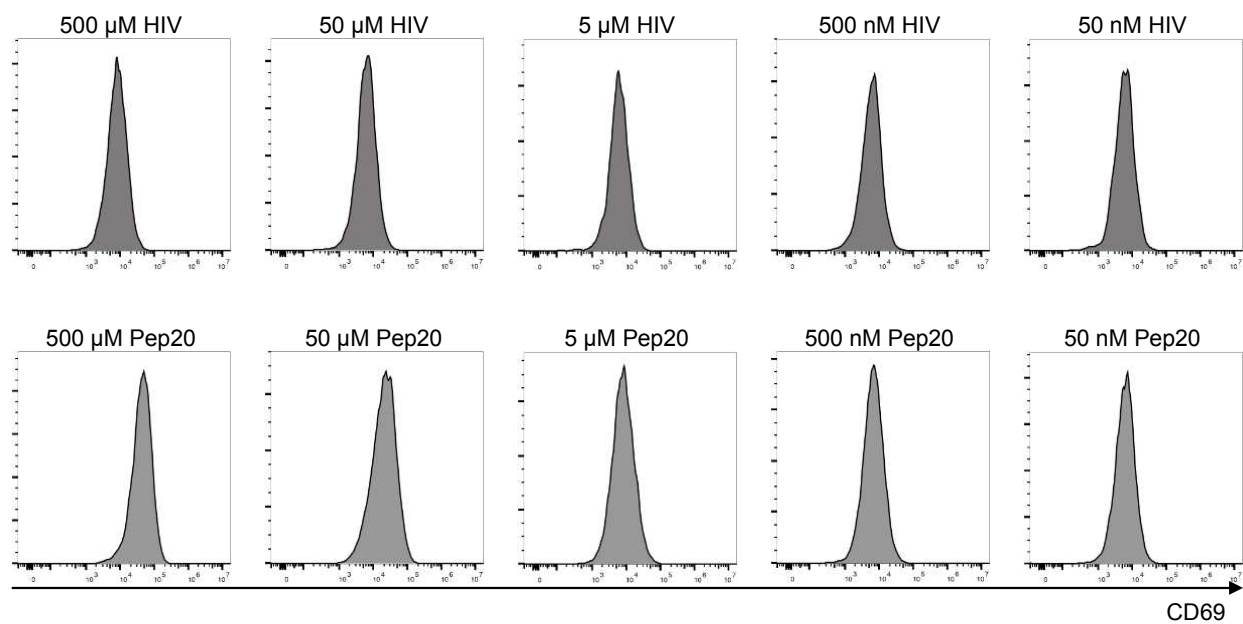

**Figure S1. Representative flow cytometry plots of Figure 1A.**

## Supplementary Figure 2

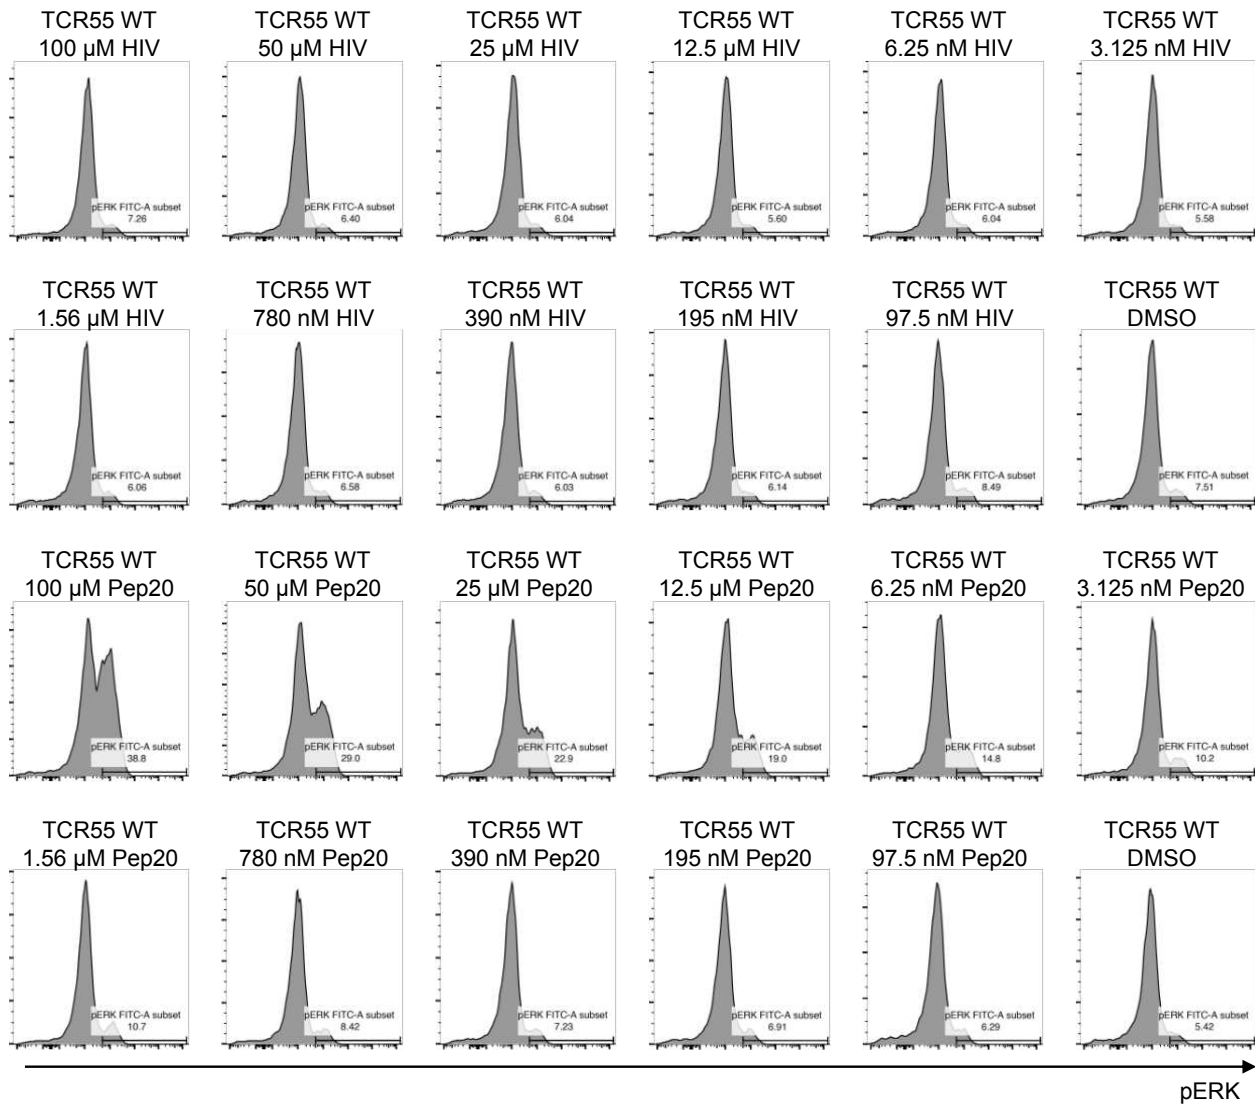

Figure S2. Representative flow cytometry plots of Figure 1B.

### Supplementary Figure 3

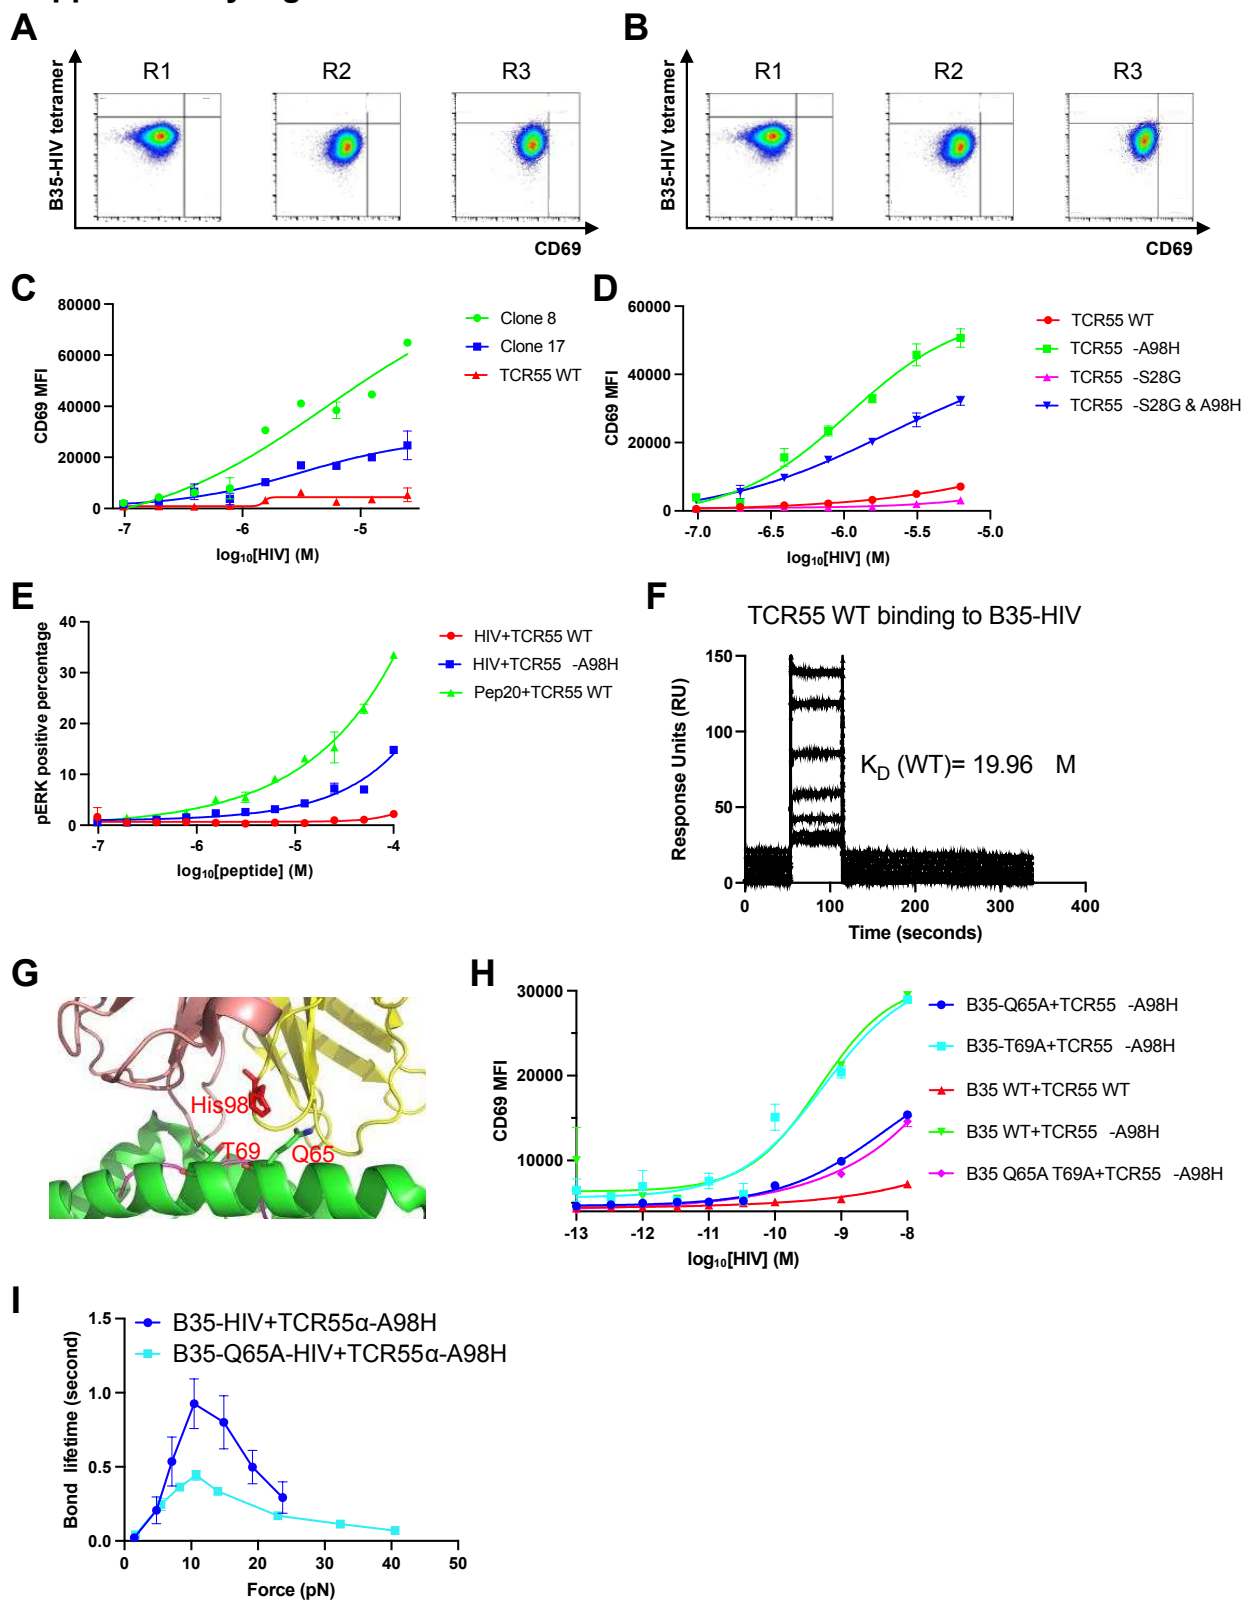

### **Figure S3. Deconvolution of stimulatory TCR55 $\alpha$ -A98 mutants.**

(A) B35-HIV tetramer staining and anti-CD69 staining of TCR55 WT SKW3 transfectants in each round of selection of V $\alpha$  library.

(B) B35-HIV tetramer staining and anti-CD69 staining of TCR55 WT SKW3 transfectants in each round of selection of V $\beta$  library.

(C) Clone 8, clone 17 and TCR55 WT SKW3 T cell transfectants were stimulated by KG-1 cells pulsed with titrated HIV peptide. Anti-CD69 staining of T cells was performed and analyzed by flow cytometry.

(D) TCR55 $\alpha$ -S28G A98H, TCR55 $\alpha$ -S28G, TCR55 $\alpha$ -A98H were transduced with WT TCR55 $\beta$  in SKW3 T cells and the transfectants were stimulated by KG-1 cells pulsed with titrated HIV peptide. Anti-CD69 staining of T cells was performed and analyzed by flow cytometry.

(E) TCR55 or TCR55 $\alpha$ -A98H-transduced SKW3 T cells were stimulated by KG-1 cells pulsed with titrated HIV or Pep20 peptides for 15 min. Anti-phospho-ERK staining was performed on the SKW3 T cells and analyzed by flow cytometry.

(F) SPR measurement of TCR55 WT protein binding to B35-HIV. Biotinylated B35-HIV monomer was immobilized on the streptavidin chip and the TCR55 WT protein was flowed through the chip.

(G) Zoomed view of B35-HIV-TCR55 structure with mutagenesis of TCR55 $\alpha$ -A98H modeled with Pymol.

(H) B35-T69A, B35-Q65A, B35-Q65A T69A effects on TCR55 $\alpha$ -A98H activation. Different B35 mutants were transduced into K562 cells. K562 transfectants were used as antigen-presenting cells to be pulsed with titrated HIV peptide and then stimulate different SKW3 T cell transfectants. Anti-CD69 staining of T cells was performed and analyzed by flow cytometry.

(I) Biomembrane force probe experiments to measure bond lifetime force curves for TCR55 $\alpha$ -A98H binding to B35-Q65A-HIV. Data are shown as mean  $\pm$  SEM of 500+ individual bond lifetimes per force curve.

(C-E, H) Data are representative of 3 independent experiments. Data are shown as mean  $\pm$  SD of technical triplicates.

### Supplementary Figure 4

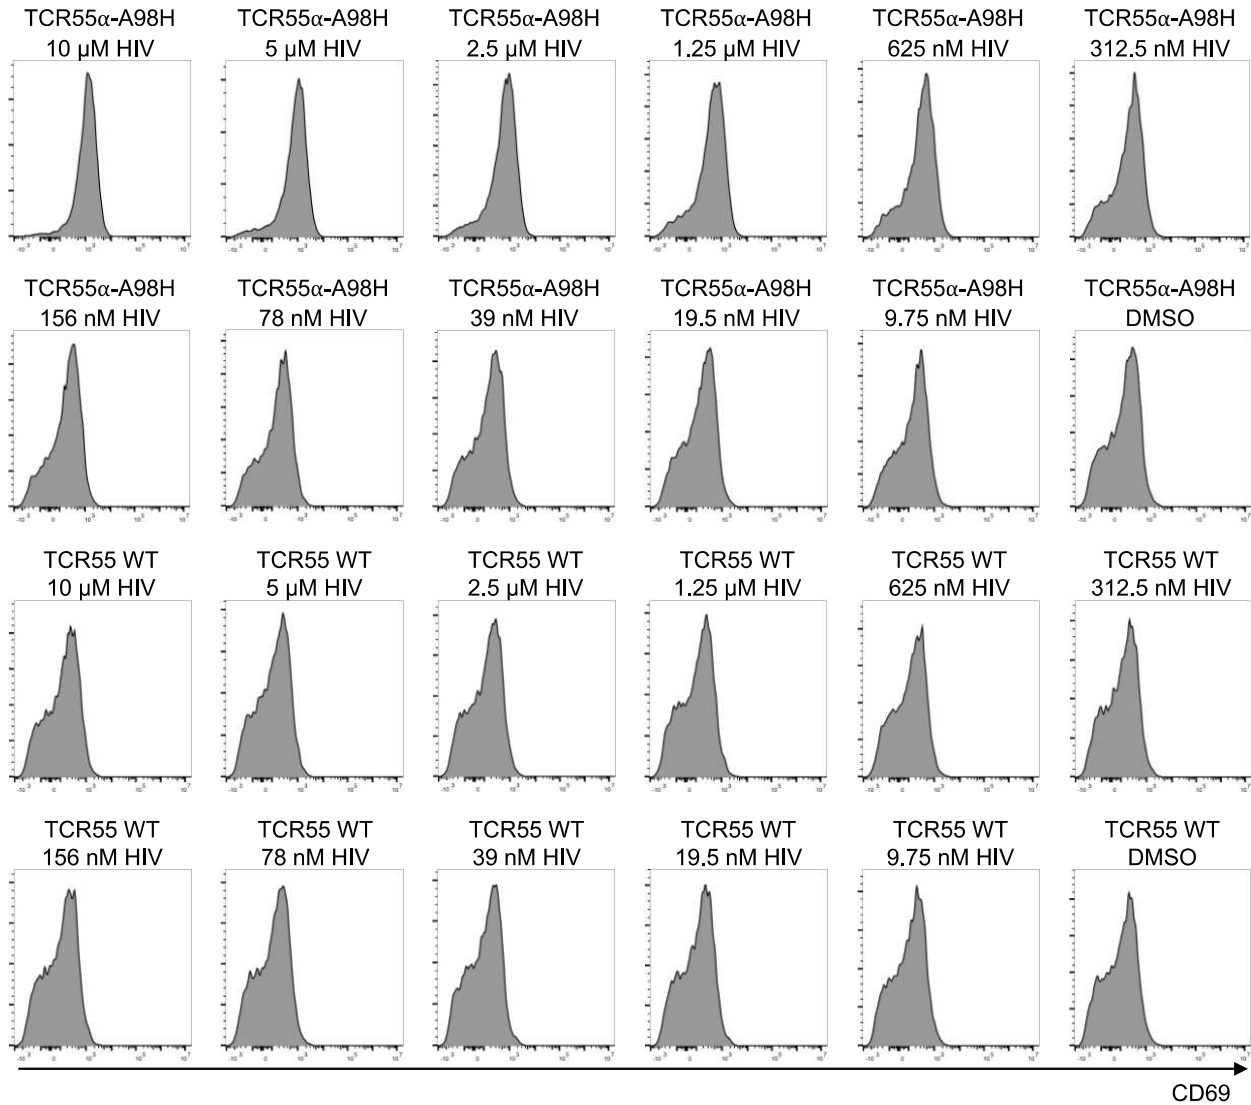

Figure S4. Representative flow cytometry plots of Figure 2B.

### Supplementary Figure 5

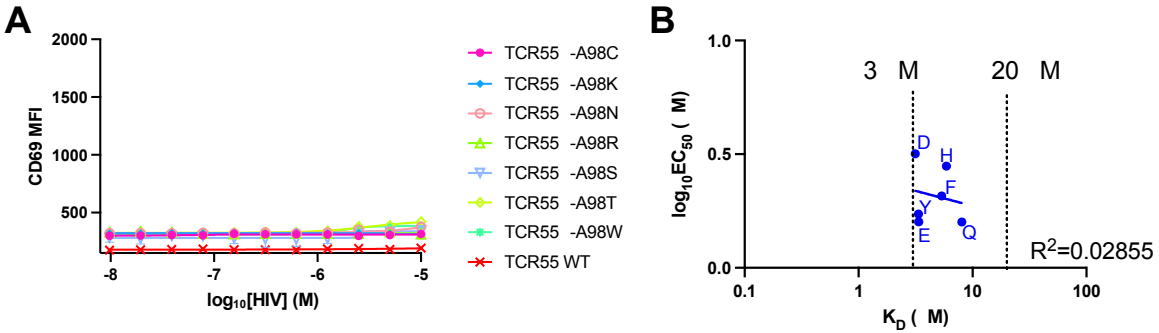

**Figure S5. Non-stimulatory TCR55 $\alpha$ -A98 mutants, and the correlation between EC<sub>50</sub> and 3D binding affinity  $K_D$  of stimulatory TCR55 $\alpha$ -A98 mutants.**

(A) TCR55 $\alpha$ -A98 was mutated to C, K, N, R, S, T, and W and used to transduce SKW3 T cells with WT TCR55 $\beta$ . The transfectants were stimulated by KG-1 cells pulsed with titrated HIV peptides for 14 hours. Anti-CD69 staining was performed on the SKW3 T cells and analyzed by flow cytometry.

(B)  $\log_{10}EC_{50}$  versus 3D binding affinity  $K_D$  of stimulatory TCR55 $\alpha$ -A98 mutants transfectants.

(A) Data are representative of 3 independent experiments. Data are shown as mean  $\pm$  SD of technical triplicates.

# Supplementary Figure 6

**A**

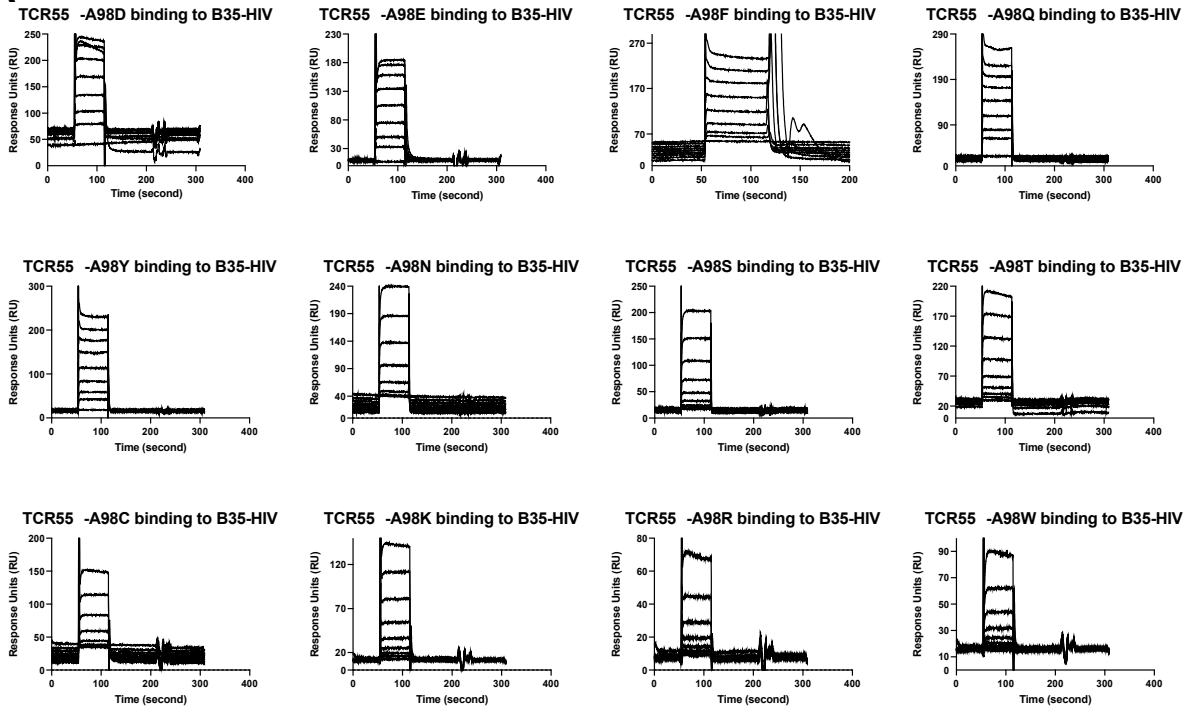

**B**

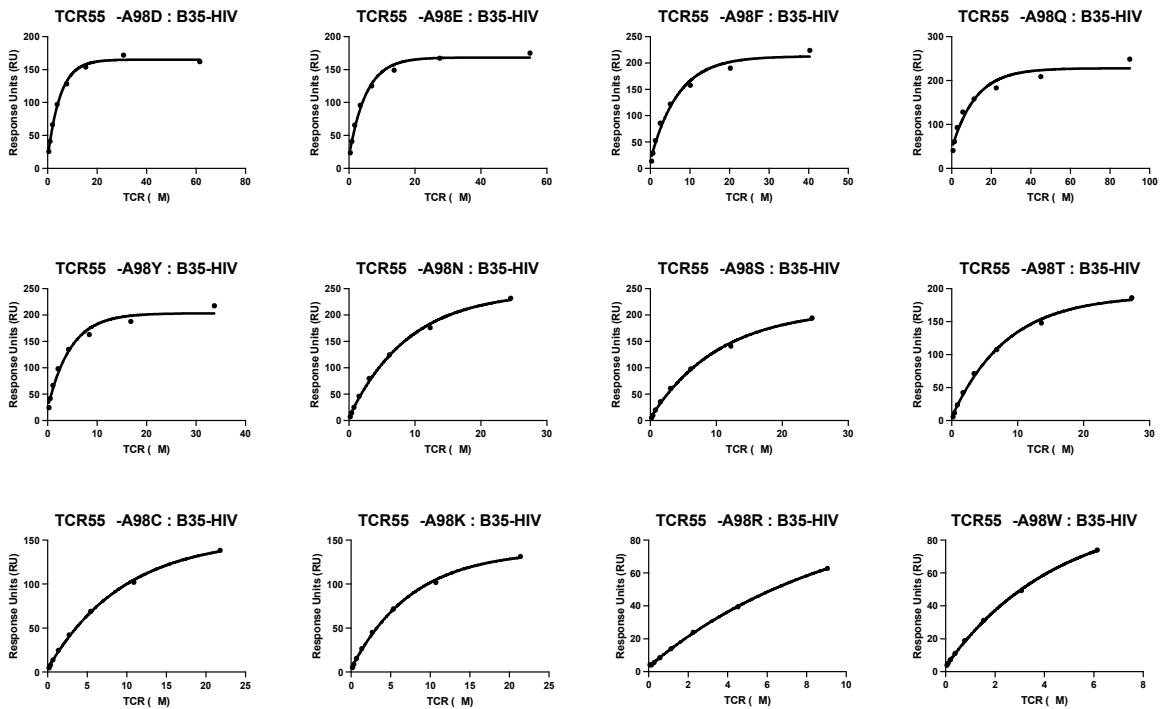



**Figure S6. SPR experiments of TCR55 $\alpha$ -A98 mutants.**

(A) SPR measurement of TCR55 $\alpha$ -A98 mutants protein binding to B35-HIV. Biotinylated B35-HIV monomer was immobilized on the streptavidin chip and the TCR55 $\alpha$ -A98 mutant proteins were flowed through the chip.

(B) Determination of 3D affinity between TCR55 $\alpha$ -A98 mutants and B35-HIV by SPR. Equilibrium curves of TCR55 $\alpha$ -A98 mutants binding to B35-HIV pMHC at 25°C. Data shown were measured at equilibrium (black dots). Black lines show the fit to a 1:1 binding curve.

# Supplementary Figure 7

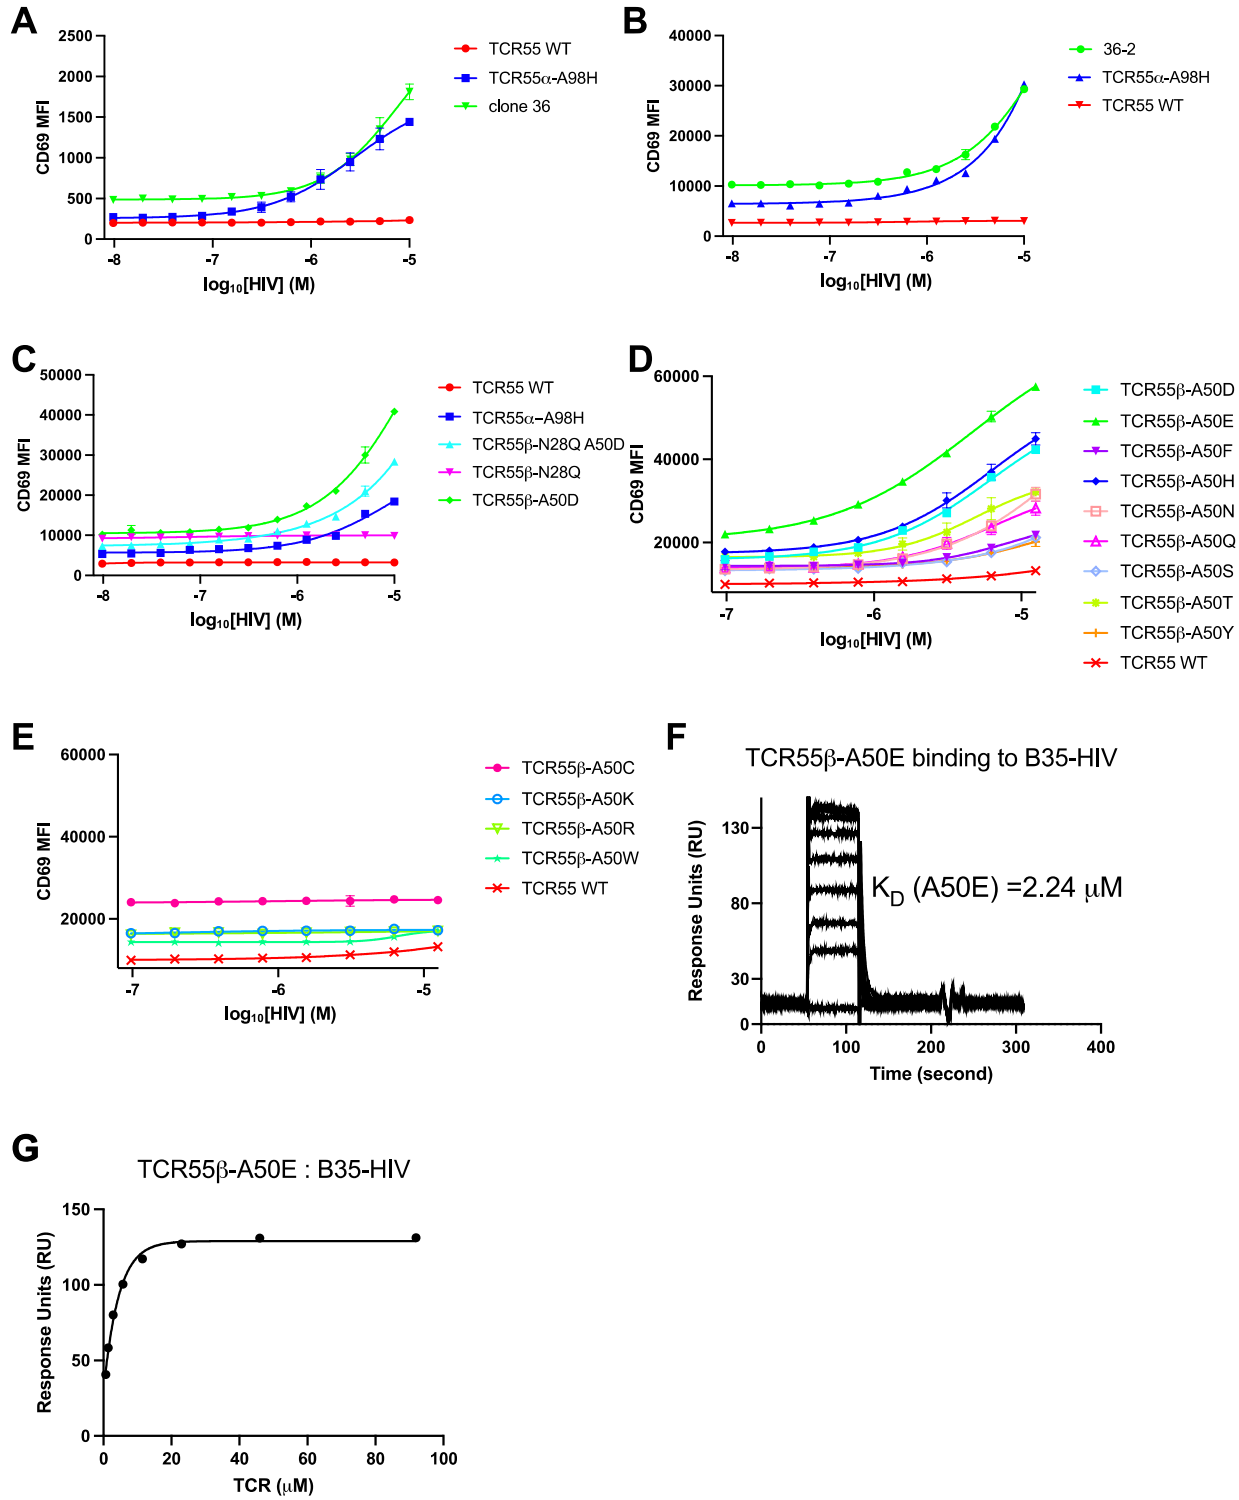

### **Figure S7. Deconvolution of stimulatory TCR55 $\beta$ -A50 mutants.**

(A) Clone 36 from V $\beta$  library was tested along with TCR55 WT and TCR55 $\alpha$ -A98H mutant. The T cell transfectants were stimulated by KG-1 cells pulsed with titrated HIV peptide. Anti-CD69 staining of T cells was performed and analyzed by flow cytometry.

(B) The TCR 36-2 sequenced from clone 36 was transduced in SKW3 T cells and the transfectants were stimulated by KG-1 cells pulsed with titrated HIV peptide. Anti-CD69 staining of T cells was performed and analyzed by flow cytometry.

(C) The TCR55 $\beta$ -N28Q A50D, TCR55 $\beta$ -N28Q, TCR55 $\beta$ -A50D were transduced with WT TCR55 $\alpha$  in SKW3 T cells and the transfectants were stimulated by KG-1 cells pulsed with titrated HIV peptide. Anti-CD69 staining of T cells was performed and analyzed by flow cytometry.

(D) The TCR55 $\beta$ -A50 was mutated to D, E, F, H, N, Q, S, T, and Y. The TCR55 $\beta$ -A50 mutants were transduced with WT TCR55 $\alpha$  in SKW3 T cells and the transfectants were stimulated by KG-1 cells pulsed with titrated HIV peptide. Anti-CD69 staining of T cells was performed and analyzed by flow cytometry.

(E) The TCR55 $\beta$ -A50 was mutated to C, K, R, and W. The TCR55 $\beta$ -A50 mutants were transduced with WT TCR55 $\alpha$  in SKW3 T cells and the transfectants were stimulated by KG-1 cells pulsed with titrated HIV peptide. Anti-CD69 staining of T cells was performed and analyzed by flow cytometry.

(F) SPR experiments of TCR55 $\beta$ -A50E protein binding to B35-HIV. Biotinylated B35-HIV monomer was immobilized on the streptavidin chip and the TCR55 $\beta$ -A50E proteins were flowed through the chip.

(G) Determination of 3D affinity between TCR55 $\beta$ -A50E and B35-HIV by SPR. Equilibrium curves of TCR55 $\beta$ -A50E mutants binding to B35-HIV pMHC at 25°C. Data shown was measured at equilibrium (black dots). Black lines show the fit to a 1:1 binding curve.

(A-E) Data are representative of 3 independent experiments. Data are shown as mean  $\pm$  SD of technical triplicates.

# Supplementary Figure 8

**A**

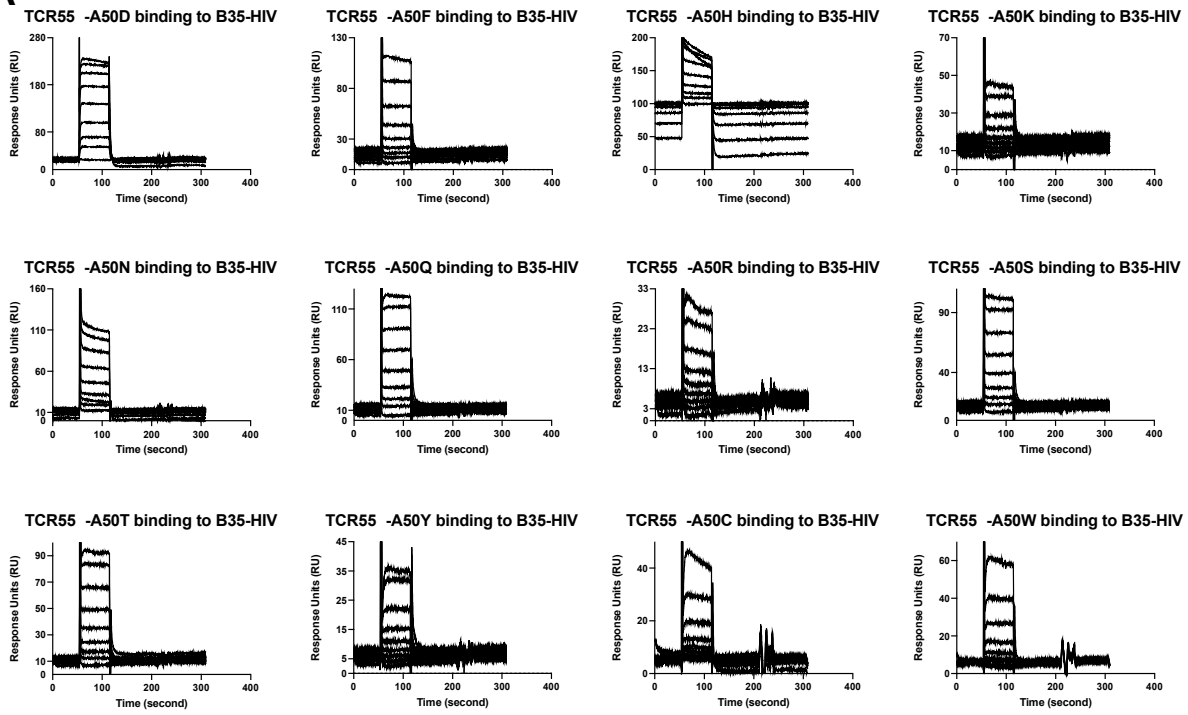

**B**

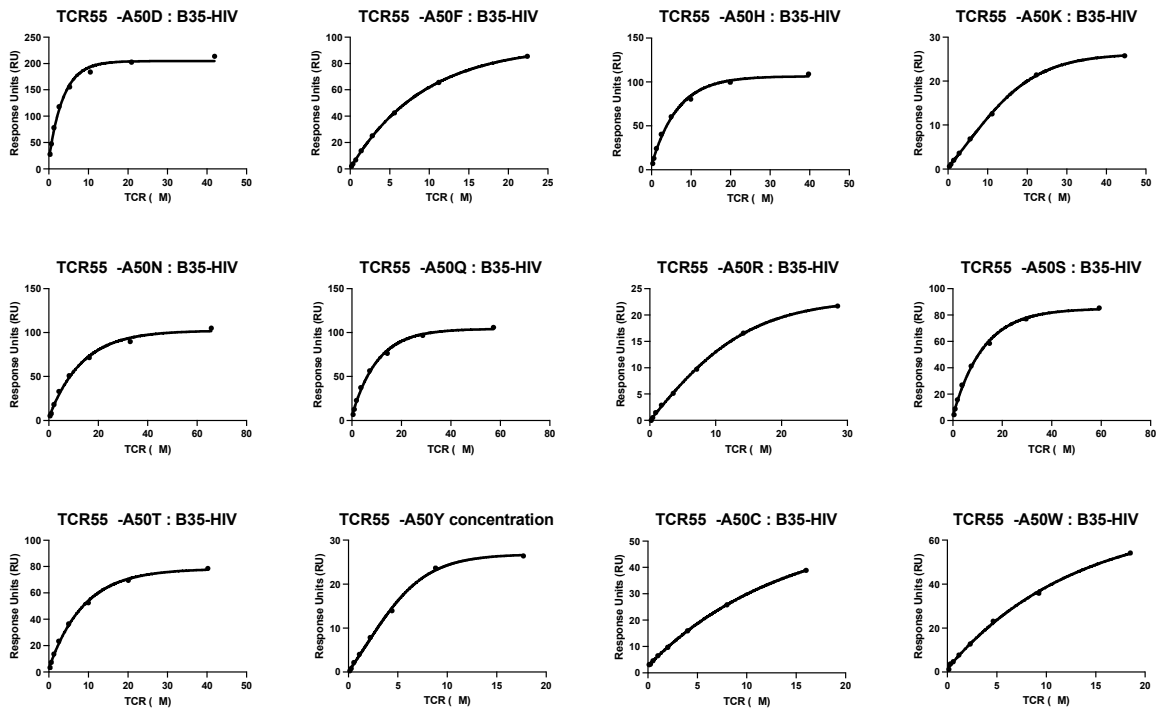

**Figure S8. SPR experiments of TCR55 $\beta$ -A50 mutants.**

(A) SPR experiments of TCR55 $\beta$ -A50 mutants protein binding to B35-HIV. Biotinylated B35-HIV monomer was immobilized on the streptavidin chip and the TCR55 $\beta$ -A50 mutant proteins were flowed through the chip.

(B) Determination of 3D affinity between TCR55 $\beta$ -A50 mutants and B35-HIV by SPR. Equilibrium curves of TCR55 $\beta$ -A50 mutants binding to B35-HIV pMHC at 25°C. Data shown were measured at equilibrium (black dots). Black lines show the fit to a 1:1 binding curve.

# Supplementary Figure 9

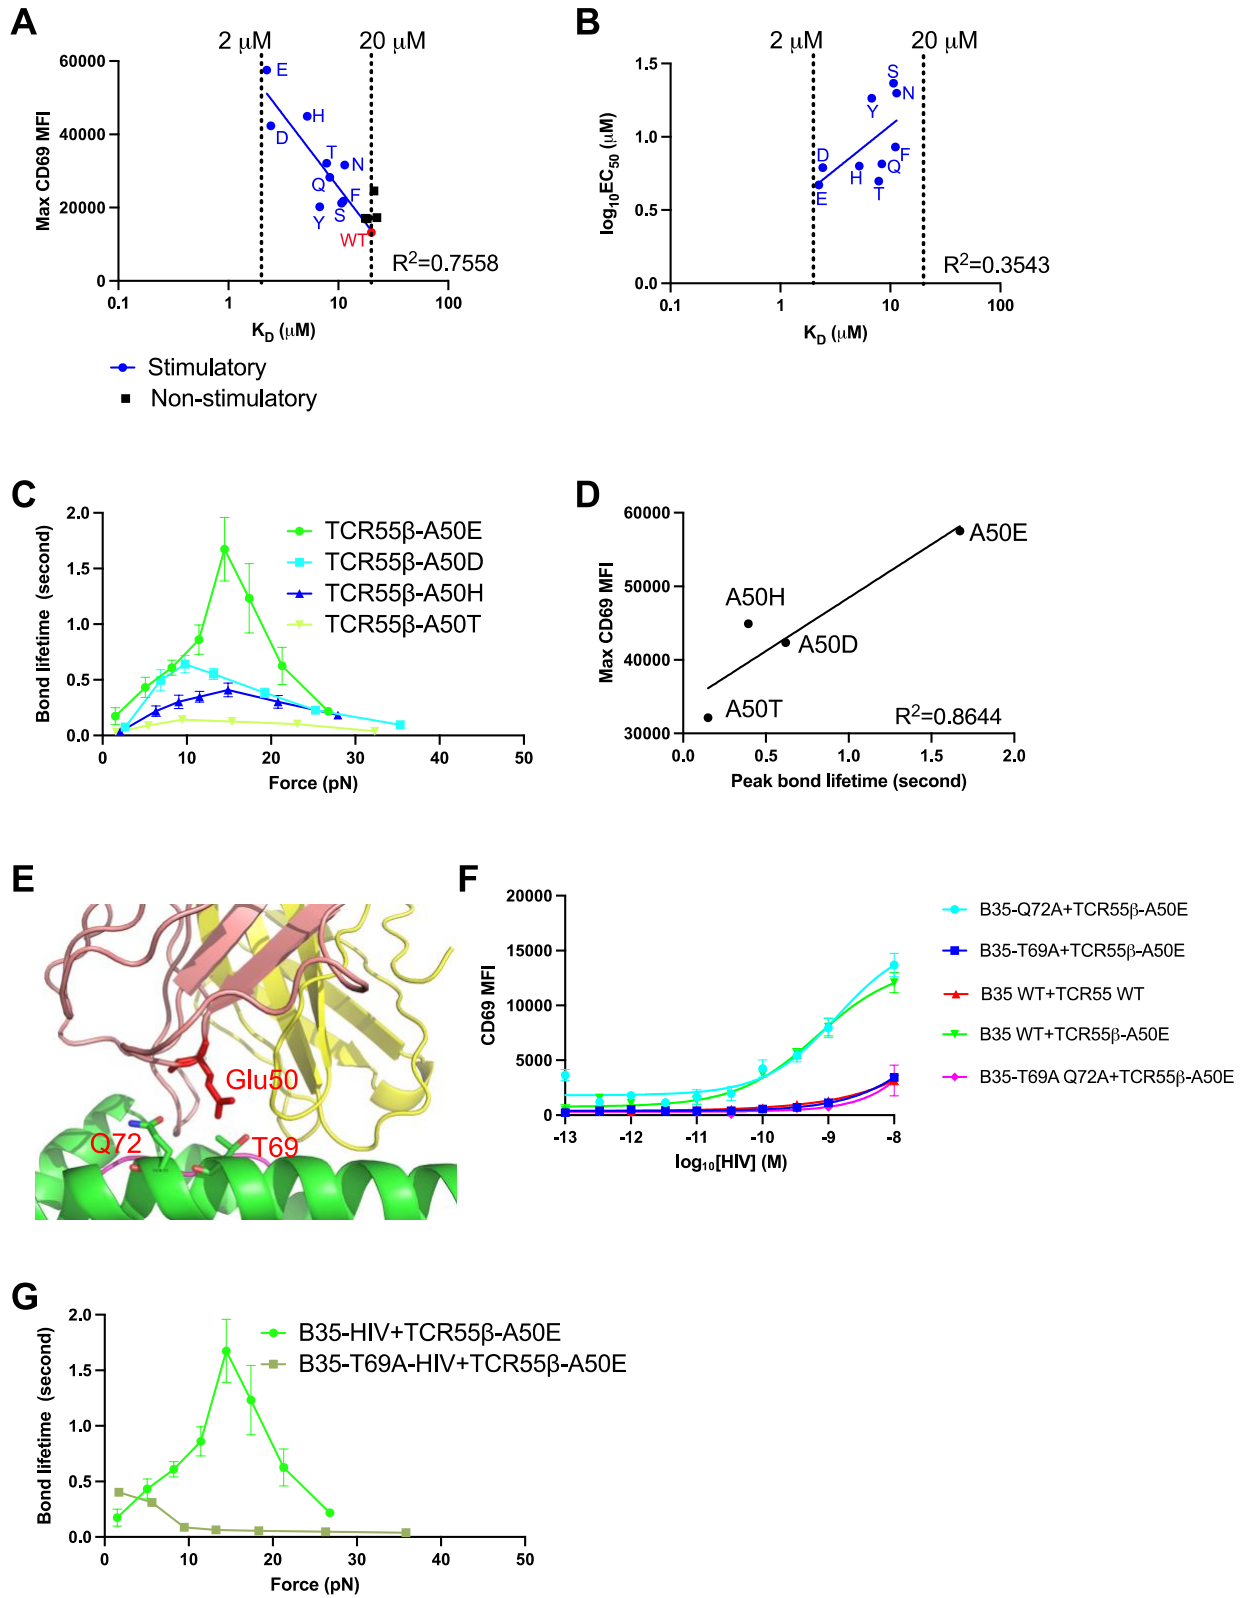

**Figure S9. Tuning TCR signaling strength of TCR55 $\beta$ -A50 mutants by different level of catch bonds.**

(A) Mean value of maximal anti-CD69 MFI versus 3D binding affinity  $K_D$  of TCR55 $\beta$ -A50 mutants. A linear correlation analysis was performed for stimulatory mutants and TCR55 WT.

(B)  $\log_{10}EC_{50}$  versus 3D binding affinity  $K_D$  of stimulatory TCR55 $\beta$ -A50 mutants

(C) Biomembrane force probe experiments to measure bond lifetime force curves for TCR55 $\beta$ -A50E, TCR55 $\beta$ -A50D, TCR55 $\beta$ -A50H or TCR55 $\beta$ -A50T binding to B35-HIV. Data are shown as mean  $\pm$  SEM of 500+ individual bond lifetimes per force curve.

(D) Mean value of maximal anti-CD69 MFI versus peak bond lifetime for TCR55 $\beta$ -A50 mutants.

(E) Zoomed view of B35-HIV-TCR55 structure with mutagenesis of TCR55 $\beta$ -A50E modeled with Pymol.

(F) B35-T69A, B35-Q72A, B35-T69A Q72A effects on TCR55 $\beta$ -A50E activation. Different B35 mutants were transduced into K562 cells. K562 transfectants were used as antigen-presenting cells pulsed with titrated HIV peptide and then used to stimulate different SKW3 T cell transfectants. Anti-CD69 staining of T cells was performed and analyzed by flow cytometry. Data are representative of 3 independent experiments. Data are shown as mean  $\pm$  SD of technical triplicates.

(G) Biomembrane force probe experiments to measure bond lifetime force curves for TCR55 $\beta$ -A50E binding to B35-T69A-HIV. Data are shown as mean  $\pm$  SEM of 500+ individual bond lifetimes per force curve.

## Supplementary Figure 10

**A**

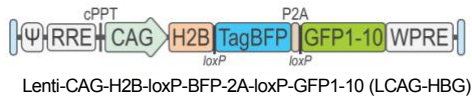

**B**

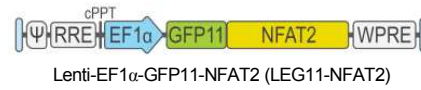

**C**

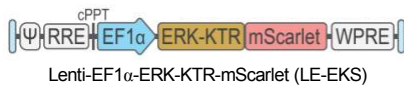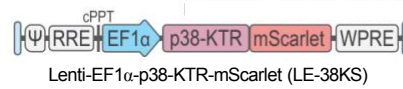

**D**

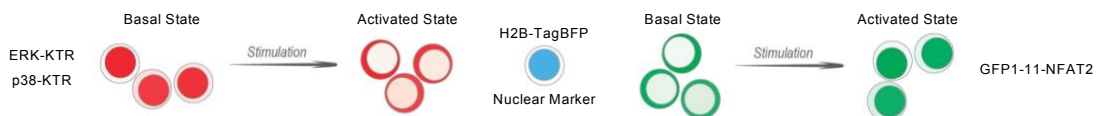

**E**

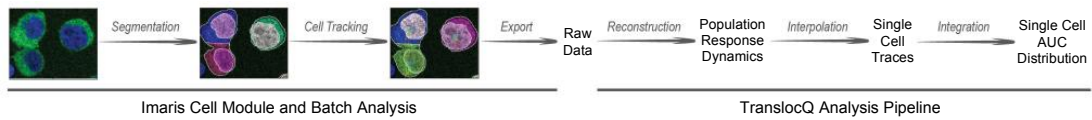

**F**

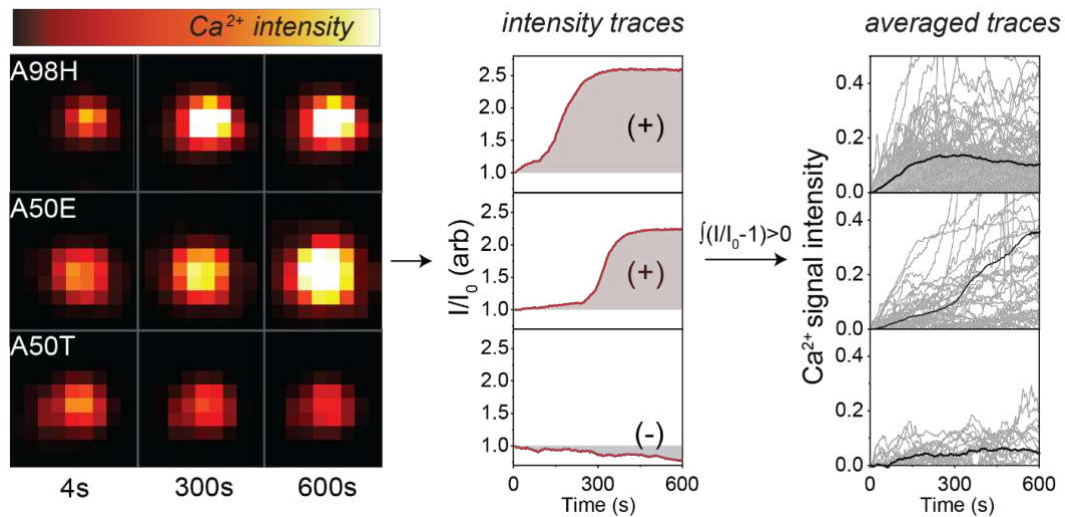



**Figure S10. Quantitative live cell imaging analysis of ERK, NFAT2 and p38 signaling dynamics and illustration of BATTLES.**

(A) H2B-tBFP nuclear marker expression and split-GFP complementation reporter system LCAG-HBG.

(B) LEG11-NFAT2 lentiviral vector for EF1 $\alpha$  promoter driven GFP11-NFAT2 expression.

(C) Lentiviral vector LE-EKS or LE-38KS for stable expression of ERK or p38 kinase translocation reporter (KTR).

(D) Schematic diagram of Jurkat live cell imaging reporter translocation states.

(E) Live cell confocal time-lapse fluorescence microscopy data analysis using Imaris Cell module and TranslocQ pipelines.

(F) Representative images (left) and processed intensity traces (middle) quantifying Ca<sup>2+</sup> flux within single TCR55 mutants T cells interacting with pMHC-coated thermo-responsive beads bearing the stimulatory HIVpol peptide (IPLTEEAEL). Ca<sup>2+</sup> flux signals of each single cells are indicated as the ratio of fluorescence intensity (I) at a certain time to the initial fluorescence intensity (I<sub>0</sub>) of the Ca<sup>2+</sup>-sensitive dye. The “+” and “-” indicates the positive and negative integrated signals over time. Right: Ca<sup>2+</sup> signal intensity as a function of time for all positive single cells ( $\int(I/I_0-1) > 0$ ) (light grey); mean signal intensity over time is shown in black.

# Supplementary Figure 11

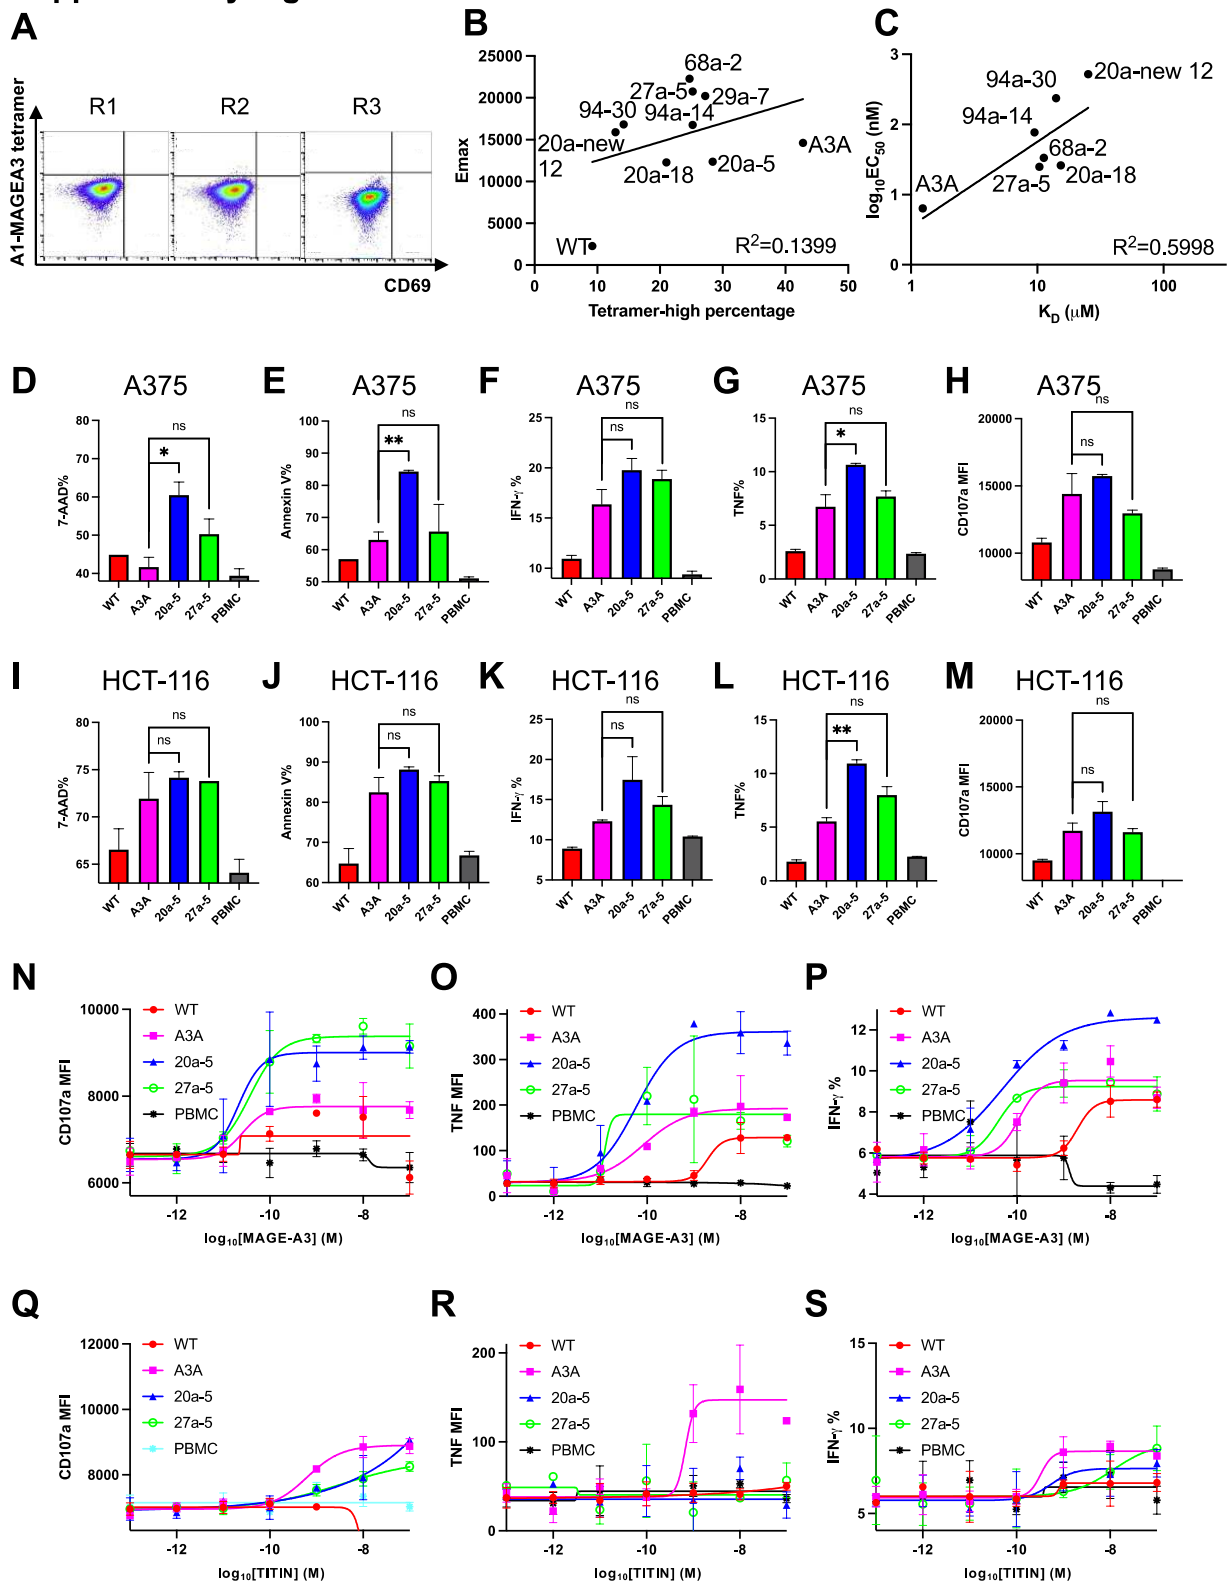

**Figure S11. Killing, cytokine responses, and granule release mediated by other MAGE-A3-specific TCR mutants.**

(A) A1-MAGE-A3 tetramer staining and anti-CD69 staining of MAGE-A3 WT TCR SKW3 transfectants in each round of selection of the library.

(B) The correlation between  $E_{\max}$  and percentage of HLA-A1-MAGE-A3 tetramer staining-high population of different MAGE-A3-specific TCR mutants in SKW3 cells.

(C) The correlation between  $\log_{10}EC_{50}$  and 3D binding affinity  $K_D$  of selected MAGE-A3-specific TCR mutants binding to HLA-A1-MAGE-A3.

(D-E) Killing of A375 melanoma cell line by different MAGE-A3-specific TCR transduced human primary T cells.

(F-H) IFN- $\gamma$ , TNF, and cytotoxic granule release (CD107a staining) by different MAGE-A3-specific TCR transduced human primary T cells stimulated by the A375 melanoma cell line

(I-J) Killing of HCT-116 colon cancer cell line by different MAGE-A3-specific TCR transduced human primary T cells.

(K-M) IFN- $\gamma$ , TNF, and cytotoxic granule release (CD107a staining) by different MAGE-A3-specific TCR transduced human primary T cells, stimulated by the HCT-116 colon cancer cell line.

(N-P) Cytotoxic granule release (CD107a staining), TNF, and IFN- $\gamma$  by different MAGE-A3-specific TCR transduced human primary T cells, stimulated by HLA-A1<sup>+</sup> 293T cells pulsed with titrated MAGE-A3 peptide.

(Q-S) Cytotoxic granule release (CD107a staining), TNF, and IFN- $\gamma$  by different MAGE-A3-specific TCR transduced human primary T cells, stimulated by HLA-A1<sup>+</sup> 293T cells pulsed with titrated TITIN peptide.

(D-S) Data are representative of 3 independent experiments. Data are shown as mean  $\pm$  SD of technical duplicates. ns: not significant; \*:  $P < 0.05$ ; \*\*:  $P < 0.01$ ; \*\*\*:  $P < 0.001$ ;

\*\*\*\*:  $P < 0.0001$

# Supplementary Figure 12

**A**

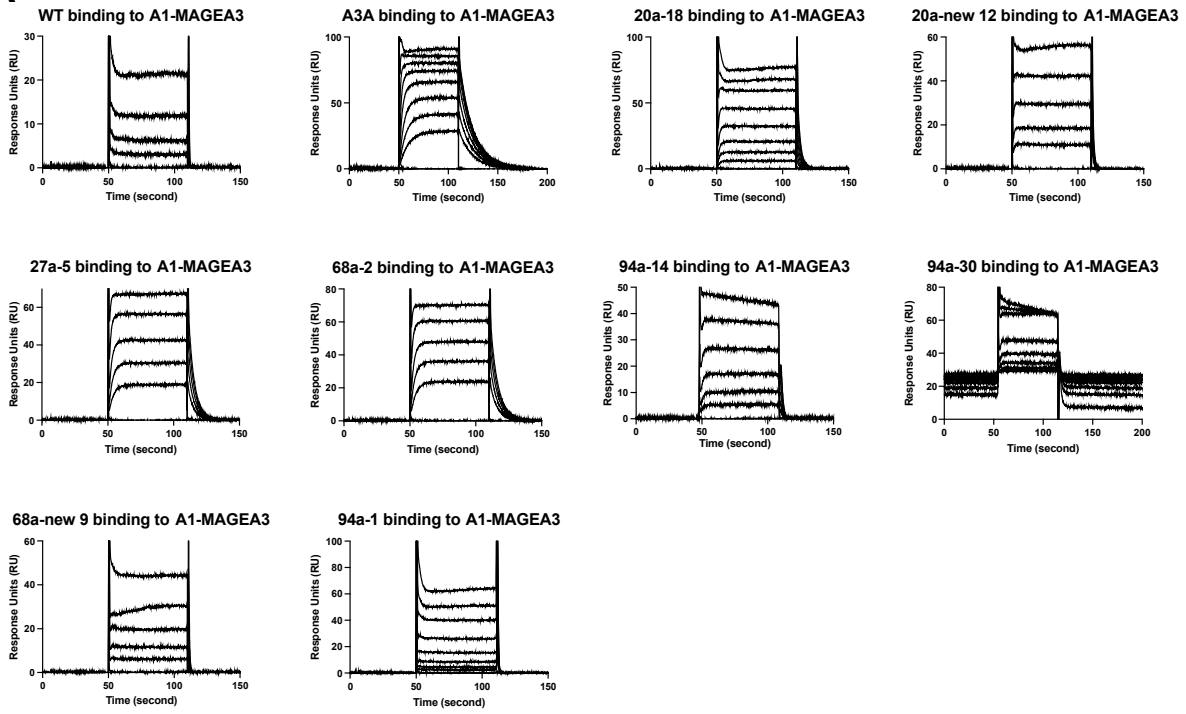

**B**

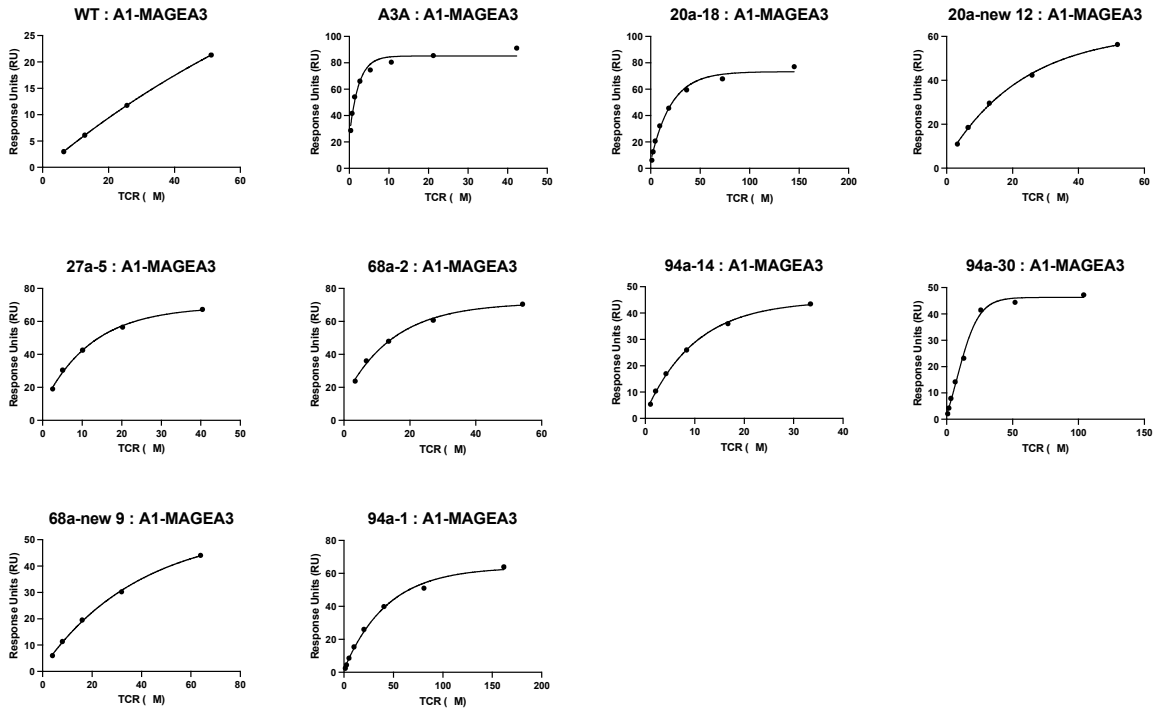

**Figure S12. SPR experiments of MAGE-A3-specific TCR mutants binding to HLA-A1-MAGE-A3.**

(A) SPR experiments of MAGE-A3-specific TCR mutants protein binding to HLA-A1-MAGE-A3. Biotinylated HLA-A1-MAGE-A3 monomer was immobilized on the streptavidin chip and the MAGE-A3-specific TCR mutant proteins were flowed through the chip.

(B) Determination of 3D affinity between MAGE-A3-specific TCR mutants and HLA-A1-MAGE-A3 by SPR. Equilibrium curves of MAGE-A3-specific TCR mutants binding to HLA-A1-MAGE-A3 pMHC at 25°C. Data shown was measured at equilibrium (black dots). Black lines show the fit to a 1:1 binding curve.

# Supplementary Figure 13

**A**

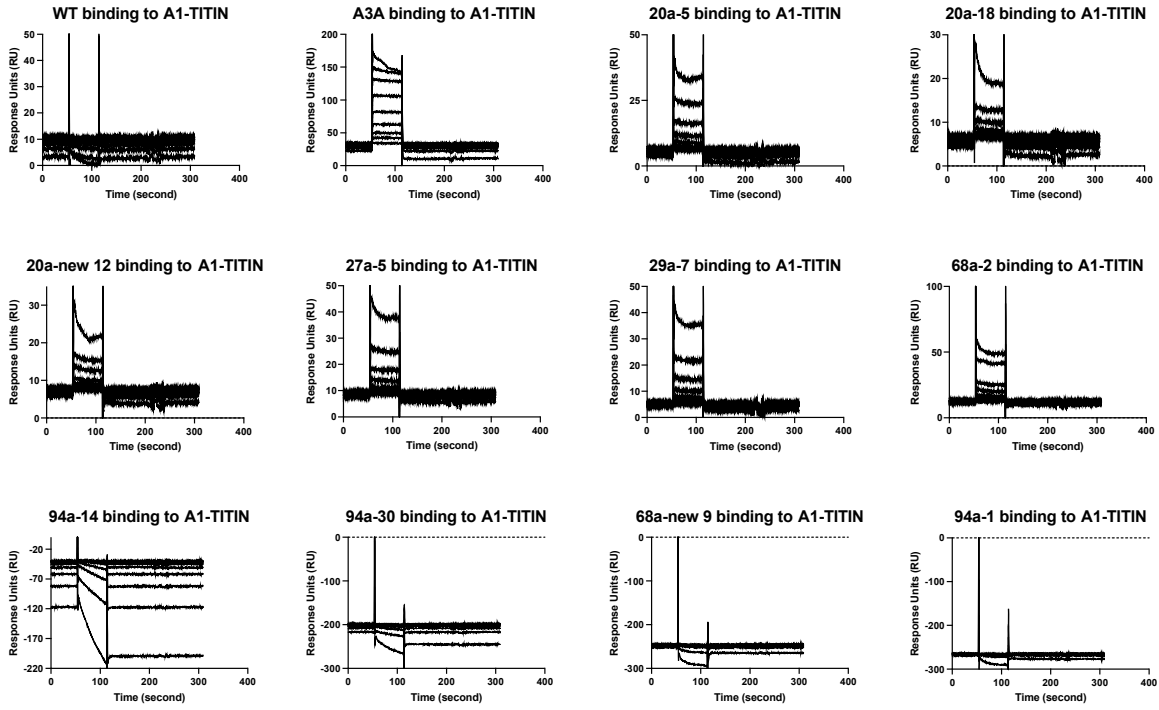

**B**

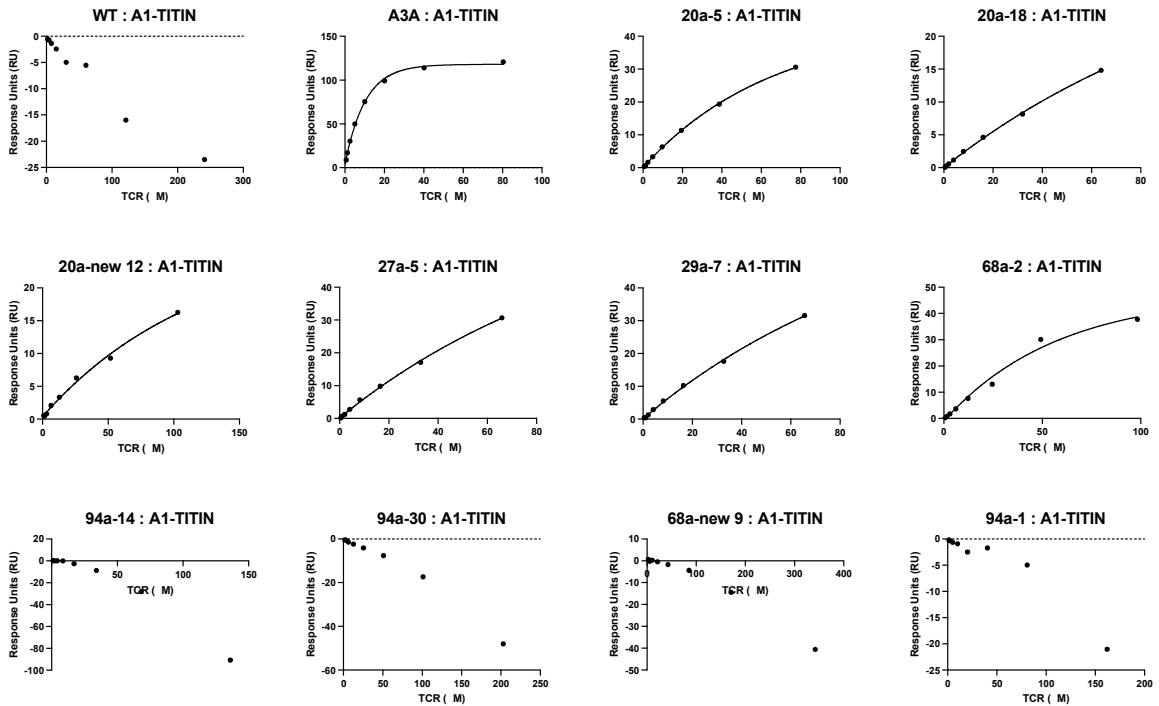

**Figure S13. SPR experiments of MAGE-A3-specific TCR mutants binding to HLA-A1-TITIN.**

(A) SPR experiments of MAGE-A3-specific TCR mutants protein binding to HLA-A1-TITIN. Biotinylated HLA-A1-TITIN monomer was immobilized on the streptavidin chip and the MAGE-A3-specific TCR mutant proteins were flowed through the chip.

(B) Determination of 3D affinity between MAGE-A3-specific TCR mutants and HLA-A1-TITIN by SPR. Equilibrium curves of MAGE-A3-specific TCR mutants binding to HLA-A1-TITIN pMHC at 25°C. Data shown was measured at equilibrium (black dots). Black lines show the fit to a 1:1 binding curve.

## Supplementary Figure 14

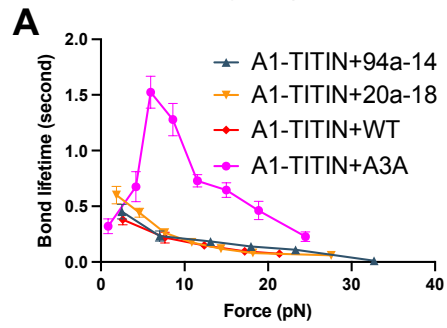

**Figure S14. Biomembrane force probe experiments to measure bond lifetime force curves for 94a-14 TCR or 20a-18 TCR binding to A1-TITIN. Data are shown as mean  $\pm$  SEM of 500+ individual bond lifetimes per force curve.**



### Supplementary Figure 15

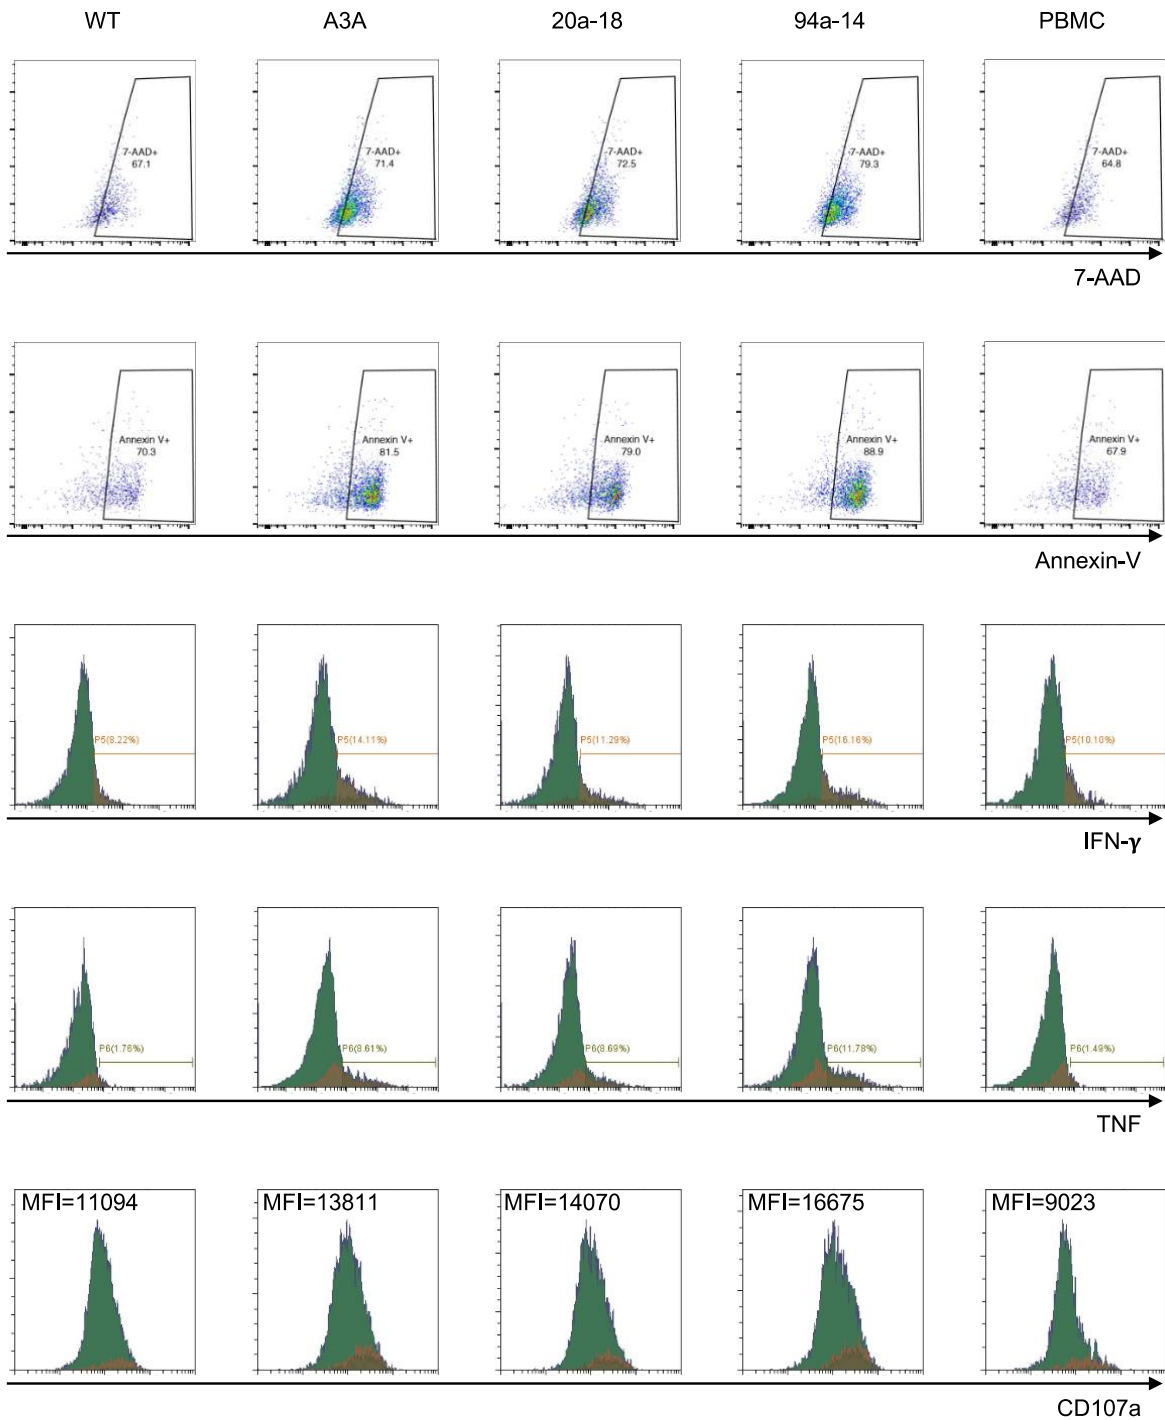

Figure S15. Representative flow cytometry plots of Figure 5F-5J.

## Supplementary Figure 16

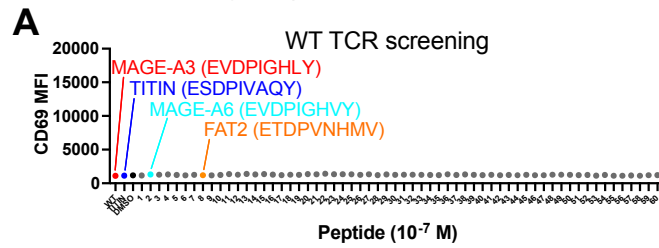

**Figure S16.** MAGE-A3 (red dot), TITIN (blue dot), DMSO (black dot) and 60 predicted peptides (MAGE-A6: cyan dot; FAT2: orange dot) were used to pulse 293T-HLA-A1 cells to stimulate SKW3 T cells expressing WT MAGE-A3 TCR for 14 hours. Anti-CD69-APC staining was performed and analyzed on flow cytometry. Data are representative of 2 independent experiments.

**Table S1** 3D affinity and EC<sub>50</sub> of TCR55 $\alpha$ -A98 mutants

| TCR                             | A98H  | A98D  | A98E  | A98F | A98Q | A98Y  | WT    | A98N  | A98S  | A98T  | A98K  | A98R  | A98C  | A98W  |
|---------------------------------|-------|-------|-------|------|------|-------|-------|-------|-------|-------|-------|-------|-------|-------|
| 3D K <sub>D</sub><br>( $\mu$ M) | 5.89  | 3.14  | 3.37  | 5.36 | 8.04 | 3.36  | 19.96 | 9.971 | 12.26 | 8.447 | 8.503 | 15.49 | 11.5  | 6.502 |
| EC <sub>50</sub><br>( $\mu$ M)  | 2.801 | 3.174 | 1.594 | 2.07 | 1.59 | 1.724 | 2758  | 3452  | 2.43  | 3.332 | 5.384 | 0.01  | 0.044 | 1.722 |

**Table S2** 3D affinity and EC<sub>50</sub> of TCR55β-A50 mutants

| TCR                       | A50D  | A50E  | A50F  | A50H  | A50N  | A50Q  | A50S  | A50T  | A50Y  | WT    | A50C   | A50K   | A50R  | A50W  |
|---------------------------|-------|-------|-------|-------|-------|-------|-------|-------|-------|-------|--------|--------|-------|-------|
| 3D K <sub>D</sub><br>(μM) | 2.429 | 2.238 | 11.11 | 5.222 | 11.41 | 8.378 | 10.68 | 7.834 | 6.761 | 19.96 | 21.11  | 22.42  | 17.6  | 18.29 |
| EC <sub>50</sub><br>(μM)  | 6.169 | 4.695 | 8.521 | 6.306 | 19.85 | 6.535 | 23.17 | 4.98  | 18.33 | 4046  | 0.9349 | 0.1622 | >1000 | 6.599 |

**Table S3** Mean values of single-cell AUC distributions

| Stimulation Type              | MAPK-KTR Reporters |       | Split-GFP Reporters |
|-------------------------------|--------------------|-------|---------------------|
|                               | ERK                | p38   | NFAT2               |
| HIVpol (TCR55)                | 0.05               | 5.92  | -11.5               |
| HIVpol (TCR55 $\alpha$ -A98H) | 100.15             | 15.96 | 66.55               |
| HIVpol (TCR55 $\beta$ -A50E)  | 129.22             | 26.00 | 125.94              |
| HIVpol (TCR589)               | 155.47             | 29.55 | 181.36              |

**Table S4** Mean values of single-cell AUC distributions (basal corrected & normalized)

| Stimulation Type              | MAPK-KTR Reporters |       | Split-GFP Reporters |
|-------------------------------|--------------------|-------|---------------------|
|                               | ERK                | p38   | NFAT2               |
| HIVpol (TCR55)                | 0%                 | 0%    | 0%                  |
| HIVpol (TCR55 $\alpha$ -A98H) | 64.4%              | 42.5% | 40.5%               |
| HIVpol (TCR55 $\beta$ -A50E)  | 83.1%              | 85%   | 71.3%               |
| HIVpol (TCR589)               | 100%               | 100%  | 100%                |

**Table S5** Specific amino acid mutations of each MAGE-A3 TCR mutants

|            | <b>TCR<br/>α chain<br/>position</b> | 28 | 30 | 51 | 52 | 53 | 54 |
|------------|-------------------------------------|----|----|----|----|----|----|
| <b>TCR</b> |                                     |    |    |    |    |    |    |
| WT         |                                     | D  | A  | I  | Q  | S  | S  |
| A3A        |                                     | D  | A  | V  | R  | P  | Y  |
| 20a-18     |                                     | H  | H  | I  | R  | S  | N  |
| 20a-5      |                                     | G  | H  | I  | R  | S  | N  |
| 20a-new 12 |                                     | H  | H  | I  | R  | S  | R  |
| 27a-5      |                                     | G  | H  | I  | R  | S  | E  |
| 29a-7      |                                     | G  | H  | I  | R  | S  | D  |
| 68a-2      |                                     | N  | H  | I  | R  | S  | D  |
| 94a-14     |                                     | G  | S  | I  | R  | S  | S  |
| 94a-30     |                                     | K  | E  | I  | R  | S  | S  |
| 68a-38     |                                     | K  | N  | I  | R  | S  | D  |
| 68a-new 9  |                                     | N  | H  | I  | Q  | S  | H  |
| 94a-1      |                                     | H  | H  | I  | H  | S  | H  |
| 94a-10     |                                     | S  | G  | I  | R  | S  | D  |
| 94a-19     |                                     | N  | G  | I  | R  | S  | S  |

**Table S6** 3D affinity and EC<sub>50</sub> of MAGE-A3 TCR mutants binding to HLA-A1-MAGE-A3

| TCR                             | WT    | A3A   | 20a-18 | 20a-new12 | 27a-5 | 68a-2 | 94a-14 | 94a-30 | 68a-new9 | 94a-1 |
|---------------------------------|-------|-------|--------|-----------|-------|-------|--------|--------|----------|-------|
| 3D K <sub>D</sub><br>( $\mu$ M) | 193.3 | 1.241 | 15.38  | 25.36     | 10.4  | 11.27 | 9.512  | 14.11  | 50.78    | 42.3  |
| EC <sub>50</sub><br>(nM)        | 1.302 | 6.365 | 26.11  | 519.6     | 24.87 | 33.49 | 77     | 236.3  | 380.5    | 569.5 |



**Table S7** 3D affinity of MAGE-A3 TCR mutants binding to HLA-A1-TITIN

| TCR                    | WT   | A3A   | 20a-5 | 20a-18 | 20a-new12 | 27a-5 | 29a-7 | 68a-2 | 94a-14 | 94a-30 | 68a-new 9 | 94a-1 |
|------------------------|------|-------|-------|--------|-----------|-------|-------|-------|--------|--------|-----------|-------|
| 3D $K_D$<br>( $\mu$ M) | N.M. | 7.726 | 98.79 | 207.4  | 185.3     | 186.8 | 182.6 | 83.5  | N.M.   | N.M.   | N.M.      | N.M.  |

N.M.: not measurable

**Table S8** Top 35 predicted wild-type peptides for TCR A3A.

| Ranking | Name                       | Sequence  | Prediction score |
|---------|----------------------------|-----------|------------------|
| 1       | TTN                        | ESDPIVAQY | 23.73            |
| 2       | WDR64                      | EEDPIASQL | 19.46            |
| 3       | EIF3E                      | ETEPIVKMF | 19.20            |
| 4       | ANAPC1 TSG24               | ETEPIVPEL | 19.14            |
| 5       | CYTH4                      | ERDPINLQV | 19.13            |
| 6       | REV3L POLZ REV3            | EFDPICALF | 18.81            |
| 7       | MAGEA3                     | EVDPIGHLV | 18.57            |
| 8       | DOCK7                      | EIEPIFASL | 18.56            |
| 9       | ZNF512 hCG_1784442         | EQEPVPAQF | 18.35            |
| 10      | BCL2L2                     | EMEPLVGQV | 18.32            |
| 11      | TTN                        | DSDPVVAQI | 18.24            |
| 12      | PREX2 DEPDC2               | EEEPLVANV | 18.19            |
| 13      | ZDBF2                      | ENEPIDSEV | 18.10            |
| 14      | MAGEA6 MAGE6               | EVDPIGHVY | 17.96            |
| 15      | ANK2                       | ESEPELAQL | 17.77            |
| 16      | MAGEB18                    | EVDPIRHYY | 17.76            |
| 17      | JPH4 JPHL1 KIAA1831        | EPEPIAMLV | 17.54            |
| 18      | PLEKHJ1 GNRPX              | EAEPVGALL | 17.43            |
| 19      | KCNC4 C1orf30              | ETEPIITYI | 17.38            |
| 20      | CENPF                      | ESEPIRNSV | 17.35            |
| 21      | PCDH18 KIAA1562            | EGDPIDTFV | 17.3450935       |
| 22      | FAT4 CDHF14 FATJ Nbla00548 | EGEPIGTNV | 17.3226175       |
| 23      | PDZRN3 KIAA1095 LNX3       | AKEPIVVQV | 17.3032435       |
| 24      | MAP1B                      | ETEPVEAYV | 17.2988336       |
| 25      | TSTA3                      | EVEPIILSV | 17.2284022       |
| 26      | CDH23 KIAA1774 KIAA1812    | ENEPSVTQL | 17.2250452       |
| 27      | MYBL2 BMYB                 | EQEPIGTDL | 17.2095391       |
| 28      | MLLT6 AF17                 | TMEPIVLQY | 17.1979566       |
| 29      | COG4                       | ELDPILTEV | 17.174741        |
| 30      | ATP5PF                     | ELDPIQKLF | 17.1714644       |
| 31      | VSIG1 GPA34                | EMEPISYIF | 17.1686524       |
| 32      | PIM1                       | EKEPLESQY | 17.1436207       |
| 33      | MED13 ARC250 KIAA0593      | EEDPILSSF | 17.1359861       |
| 34      | PDGFB PDGF2 SIS            | EGDPIPEEL | 17.1352707       |
| 35      | CFAP54                     | ETEPMVLLE | 17.119691        |

**Table S9** Top 35 predicted wild-type peptides for TCR 94a-14.

| Ranking | Name                        | Sequence  | Prediction score |
|---------|-----------------------------|-----------|------------------|
| 1       | MAGEA3 MAGE3                | EVDPIGHLY | 16.81            |
| 2       | MAGEA6 MAGE6                | EVDPIGHVY | 16.10            |
| 3       | ZDBF2 KIAA1571              | ENEPIDSEV | 15.78            |
| 4       | SNX29 RUNDC2A               | ETEPVFWYY | 15.65            |
| 5       | MAGEB18                     | EVDPIRHYY | 15.62            |
| 6       | FCER1A FCE1A                | ESEPVYLEV | 15.51            |
| 7       | C11orf16                    | NTDPIFLEM | 15.27            |
| 8       | FBXO41 FBX41 KIAA1940       | ATDPVGHEV | 15.24            |
| 9       | CDHR1 KIAA1775 PCDH21 PRCAD | EGDPISYHI | 15.12            |
| 10      | FAT2 CDHF8 KIAA0811 MEGF1   | ETDPVNHMV | 15.02            |
| 11      | ARSD                        | DSEPLYHAV | 15.01            |
| 12      | ANKRD30B                    | SVEPIFSLF | 15.00            |
| 13      | ANAPC1 TSG24                | ETEPIVPEL | 14.98            |
| 14      | RAB3IL1                     | DAEPMFWEI | 14.89            |
| 15      | DCHS2                       | SSEPIFYRI | 14.89            |
| 16      | PDE12                       | ESDPLHKEL | 14.87            |
| 17      | NYAP2 KIAA1486              | EEEPVYIEM | 14.79            |
| 18      | SPIDR                       | DEDPIYKLY | 14.77            |
| 19      | MAGEE1 HCA1 KIAA1587        | DSDPVQYEF | 14.74            |
| 20      | MYO16 KIAA0865 MYO16B NYAP3 | DSEPVYIEM | 14.70            |
| 21      | PIK3C2A                     | STEPIYLSL | 14.6732437       |
| 22      | SLC13A4 SUT1                | EAEPISLDV | 14.6705914       |
| 23      | GNL3L                       | DTDPLEMEI | 14.6357622       |
| 24      | ELP1 IKAP IKBKAP            | EVDPVSREV | 14.6339629       |
| 25      | UNC5C                       | EQEPLGKEV | 14.6338296       |
| 26      | FAM217B C20orf177           | EIDPVYFDL | 14.6317501       |
| 27      | USP26                       | EKEPLAHLM | 14.6015921       |
| 28      | COG4                        | ELDPILTEV | 14.5888571       |
| 29      | MYBL2 BMYB                  | EQEPIGTDL | 14.5673226       |
| 30      | PDGFB PDGF2 SIS             | EGDPIPEEL | 14.5337701       |
| 31      | ACER3                       | VKEPIFHQV | 14.5006386       |
| 32      | STAG1 DKFZp781D1416         | DAEPIFEDV | 14.4719977       |
| 33      | MERTK                       | VSDPIYIEV | 14.4641397       |
| 34      | DISP3 KIAA1337 PTCHD2       | EEEPVSLEL | 14.458422        |
| 35      | PPP2R5C KIAA0044            | ITEPIYPEV | 14.4560187       |

**Table S10** Top 35 predicted wild-type peptides for TCR 20a-18.

| Ranking | Name                        | Sequence   | Prediction score |
|---------|-----------------------------|------------|------------------|
| 1       | SNX29 RUNDC2A               | ETEPVFWYY  | 17.26            |
| 2       | MAGEA3                      | EVDPIGHLY  | 16.47            |
| 3       | RAB3IL1                     | DAEPMFWEI  | 16.12            |
| 4       | C11orf16                    | NTDPIFLEM  | 15.80            |
| 5       | PIK3C2A                     | STEPIYLSL  | 15.75            |
| 6       | FBXO41 FBX41 KIAA1940       | ATDPVGHEV  | 15.70            |
| 7       | ZDHHC16                     | AFEPVYWLV  | 15.62            |
| 8       | MAGEA6                      | EVDPIGHVY  | 15.59            |
| 9       | FCER1A FCE1A                | ESEPVYLEV  | 15.51            |
| 10      | ANKRD30B                    | SVEPIFSLF  | 15.46            |
| 11      | RAB3IL1                     | LTEPMFWEI  | 15.42            |
| 12      | NWD1                        | TAEPVFHIL  | 15.42            |
| 13      | ACER3                       | VKEPIFHQV  | 15.30            |
| 14      | FAT2 CDHF8 KIAA0811 MEGF1   | ETDPVNHMV  | 15.24            |
| 15      | SPIDR                       | DEDPIYKLY  | 15.24            |
| 16      | MAGEB18                     | EVDPIRHYY  | 15.21            |
| 17      | DCHS2                       | SSEPIFYRI  | 15.17            |
| 18      | ARSD                        | DSEPLYHAV  | 15.11            |
| 19      | MYO16 KIAA0865 MYO16B NYAP3 | DSEPVYIEM  | 15.05            |
| 20      | NYAP2 KIAA1486              | EEEEPVYIEM | 14.93            |
| 21      | GPR82                       | STDPIIFLL  | 14.82447         |
| 22      | NUFIP1                      | RKEPVFHFF  | 14.816694        |
| 23      | FAT3 CDHF15 KIAA1989        | TSEPIYYPV  | 14.807425        |
| 24      | PPP2R5C                     | ITEPIYPEV  | 14.7779635       |
| 25      | CSMD3 KIAA1894              | QTEPIYDFI  | 14.7775383       |
| 26      | FAM217B C20orf177           | EIDPVYFDL  | 14.7767125       |
| 27      | DNAH17                      | DKEPVPWEF  | 14.7310013       |
| 28      | SLC3A1                      | EVDPIFGTM  | 14.717045        |
| 29      | NOMO1                       | KIEPVFHVM  | 14.6294235       |
| 30      | MFSD2A MFSD2 NLS1 HMFN0656  | GTEPIFFSF  | 14.6004367       |
| 31      | ELP2 STATIP1                | EFEPVFSLF  | 14.5157106       |
| 32      | STAG1 SA1 SCC3              | DAEPIFEDV  | 14.494468        |
| 33      | MGA KIAA0518 MAD5           | DKDPVYLYF  | 14.474143        |
| 34      | DOCK6 KIAA1395              | EIEPIFGIL  | 14.4357737       |
| 35      | FAT1 CDHF7 FAT              | ESDPVAHMI  | 14.4343329       |

**Table S11** Top 35 predicted wild-type peptides for TCR 94a-30.

| Ranking | Name                    | Sequence   | Prediction score |
|---------|-------------------------|------------|------------------|
| 1       | RAB3IL1                 | DAEPMFWEI  | 20.0667597       |
| 2       | SPIDR KIAA0146          | DEDPIYKLY  | 19.5092452       |
| 3       | DNAH17                  | DKEPVPWEF  | 19.4827738       |
| 4       | CUX1 CUTL1              | REEPIEWEF  | 19.143669        |
| 5       | MYO16                   | DSEPVYIEM  | 18.6962277       |
| 6       | SHMT2                   | DSDPEMWEL  | 18.423906        |
| 7       | CCDC146 KIAA1505        | DQEPIYAIV  | 18.4129163       |
| 8       | PPP2R5C                 | ITEPIYPEV  | 18.3599013       |
| 9       | MUC16                   | DREQLYWEL  | 18.2302094       |
| 10      | MUC16 CA125             | DRERLYWEL  | 18.1688925       |
| 11      | GVINP1 GVIN1 VLIG1      | DSENILWEY  | 17.7209221       |
| 12      | MERTK                   | VSDPIYIEV  | 17.6664431       |
| 13      | ROS1 MCF3 ROS           | DGDLIYWII  | 17.4945727       |
| 14      | FCER1A FCE1A            | ESEPVYLEV  | 17.3626517       |
| 15      | SNTA1 SNT1              | DPEPRYLEI  | 17.3616783       |
| 16      | ANAPC1 TSG24            | ETEPIVPEL  | 17.3228682       |
| 17      | ZP4 ZPB                 | LRDPIYVEV  | 17.2909522       |
| 18      | GPR151 GALR4 GALRL PGR7 | DNDPIPWEH  | 17.1894581       |
| 19      | C11orf16                | NTDPIFLEM  | 17.1560792       |
| 20      | ARSD                    | DSEPLYHAV  | 17.0613837       |
| 21      | ZDHHC16                 | AFEPVYWLV  | 17.0503827       |
| 22      | NYAP2 KIAA1486          | EEEEPVYIEM | 16.9569564       |
| 23      | PIK3C2A                 | STEPIYLSL  | 16.9116585       |
| 24      | NYNRIN CGIN1 KIAA1305   | LTEPLWWEM  | 16.9105401       |
| 25      | GSTA3                   | RMEPIRWLL  | 16.9103569       |
| 26      | RAB3IL1                 | LTEPMFWEI  | 16.8881982       |
| 27      | SNX29 RUNDC2A           | ETEPVFWYY  | 16.8561948       |
| 28      | FXVD2 ATP1C ATP1G1      | DVDPFYYDY  | 16.8540202       |
| 29      | ZDBF2                   | ENEPIDSEV  | 16.7988416       |
| 30      | MAGEE1 HCA1 KIAA1587    | DSDPVQYEF  | 16.7847655       |
| 31      | LAMA2 LAMM              | HLEPFYWKL  | 16.7546725       |
| 32      | DNAH17                  | ETEGIPWEV  | 16.7150722       |
| 33      | COG4                    | ELDPILTEV  | 16.6944252       |
| 34      | MAGEA3 MAGE3            | EVDPIGHLV  | 16.6913823       |
| 35      | TRIM27 RFP RNF76        | EREKIVWEF  | 16.6573062       |

**Table S12** 60 wild-type peptides tested for activation.

| Peptide ID | Peptide name                                     | Peptide sequence |
|------------|--------------------------------------------------|------------------|
| 1          | ZDBF2 KIAA1571                                   | ENEPIDSEV        |
| 2          | MAGEA6 MAGE6                                     | EVDPIGHVY        |
| 3          | MAGEB18                                          | EVDPIRHYY        |
| 4          | ANAPC1 TSG24                                     | ETEPIVPEL        |
| 5          | WDR64                                            | EEDPIASQL        |
| 6          | PCDH18 KIAA1562                                  | EGDPIDTFV        |
| 7          | EIF3E                                            | ETEPIVKMF        |
| 8          | FAT2 CDHF8 KIAA0811 MEGF1                        | ETDPVNHMV        |
| 9          | PDGFB PDGF2 SIS                                  | EGDPIPEEL        |
| 10         | CYTH4 CYT4 PSCD4                                 | ERDPINLQV        |
| 11         | DOCK7 KIAA1771                                   | EIEPIFASL        |
| 12         | CDHR1 KIAA1775 PCDH21 PRCAD                      | EGDPISYHI        |
| 13         | SNX29 RUNDC2A                                    | ETEPVFWYY        |
| 14         | JPH4                                             | EPEPIAMLV        |
| 15         | KCNC4 C1orf30                                    | ETEPIITYI        |
| 16         | MYBL2 BMYB                                       | EQEPIGIDL        |
| 17         | COG4                                             | ELDPILTEV        |
| 18         | CFAP44 WDR52                                     | ETEPIDEDI        |
| 19         | FCER1A                                           | ESEPVYLEV        |
| 20         | VSIG1 GPA34                                      | EMEPISYIF        |
| 21         | RAB3IL1                                          | DAEPMFWEI        |
| 22         | C11orf16                                         | NTDPFILEM        |
| 23         | PIK3C2A                                          | STEPIYLSL        |
| 24         | FBXO41 FBX41 KIAA1940                            | ATDPVGHVEV       |
| 25         | ZDHHC16                                          | AFEPVYWLVL       |
| 26         | ANKRD30B                                         | SVEPIFSLF        |
| 27         | RAB3IL1                                          | LTEPMFWEI        |
| 28         | NWD1                                             | TAEPVFHIL        |
| 29         | ACER3                                            | VKEPIFHQV        |
| 30         | SPIDR                                            | DEDPYKLY         |
| 31         | DCHS2                                            | SSEPIFYRI        |
| 32         | ARSD                                             | DSEPLYHAV        |
| 33         | MYO16 KIAA0865 MYO16B NYAP3                      | DSEPVYIEM        |
| 34         | NYAP2 KIAA1486                                   | EEEEVYIEM        |
| 35         | GPR82                                            | STDPIIFLL        |
| 36         | ELP1 IKAP IKBKAP                                 | EVDPVSREV        |
| 37         | UNC5C                                            | EQEPLGKEV        |
| 38         | PDE12                                            | ESDPLHKEL        |
| 39         | P3H2 LEPREL1 MLAT4                               | TLDPLYREL        |
| 40         | TEX14 SGK307                                     | SVEPVSSSEI       |
| 41         | PNKD KIAA1184 MR1 TAHCCP2 FKSG19 UNQ2491/PRO5778 | EPEPLSPEL        |
| 42         | HINFP MIZF ZNF743                                | EDDPLEEEF        |
| 43         | A2M CPAMD5 FWP007                                | HLEPMSHEL        |
| 44         | ZNF280D KIAA1584 SUHW4 ZNF634                    | EQEPPVSKAI       |
| 45         | PPP2R5C                                          | ITEPIYPEV        |
| 46         | MCM3AP GANP KIAA0572 MAP80                       | QEEPLPHEL        |
| 47         | MAGEE1 HCA1 KIAA1587                             | DSDPVQYEF        |
| 48         | DNAH17                                           | DKEPVPWEF        |
| 49         | CUX1 CUTL1                                       | REEPIWEF         |
| 50         | SHMT2                                            | DSDPEMWEL        |
| 51         | CCDC146 KIAA1505                                 | DQEPIYAV         |
| 52         | MUC16                                            | DREQLYWEL        |
| 53         | MUC16 CA125                                      | DRERLYWEL        |
| 54         | GVINP1 GVIN1 VLIIG1                              | DSENLWEY         |
| 55         | MERTK                                            | VSDPIYIEV        |
| 56         | ROS1 MCF3 ROS                                    | DGDLIYWI         |
| 57         | SNTA1 SNT1                                       | DPEPRYLEI        |
| 58         | ZP4 ZPB                                          | LRDPIYVEV        |
| 59         | GPR151 GALR4 GALRL PGR7                          | DNDPIPWEH        |
| 60         | MAGE-A12                                         | EVVRIGHLY        |
